# Supplementary material
Source: PubMed Central journal article supplement (PMC7365572)
Supplement: NIHMS1536825-supplement-2.pdf [file NIHMS1536825-supplement-2.pdf]

**Supplemental Information files for:**

**E-cadherin is required for metastasis in multiple models of breast cancer**

Veena Padmanaban<sup>1</sup>, Ilona Krol<sup>3</sup>, Yasir Suhail<sup>2</sup>, Barbara M. Szczerba<sup>3</sup>, Nicola Aceto<sup>3</sup>,  
Joel S. Bader<sup>2</sup>, and Andrew J. Ewald<sup>1,2\*</sup>

### **Supplementary Information 1: References for apoptosis regulating transcripts**

PMIDs describing the role of each differentially expressed transcript in apoptosis that is represented in red in Extended Data Fig. 8e. RNA-seq was performed by comparing transcriptomes of 4 adeno-Cre treated MMTV-PyMT; E-cad<sup>+/+</sup> organoids to 5 adeno-Cre treated MMTV-PyMT; E-cad<sup>fl/fl</sup> organoids. Statistical significance was calculated using the Wald test. Adjusted p-values reported here are corrected for multiple testing with the Benjamini-Hochberg method. Fold change is reported as experimental/control for experimental > control and as -control/experimental for control > experimental. Genome wide significance = 1.7 E-6 (FWER = 0.05).

| <b>Transcript</b> | <b>p-value (adj)</b> | <b>Fold change</b> | <b>PMID(s)</b>      |
|-------------------|----------------------|--------------------|---------------------|
| <i>Wnt7b</i>      | 2.24E-14             | 1.92               | 23386686            |
| <i>Cacna1a</i>    | 1.43E-09             | 1.98               | 27342111            |
| <i>Bmp2</i>       | 2.59E-09             | 1.90               | 22735990; 28725489  |
| <i>Foxj1</i>      | 2.59E-09             | 2.49               | 18836996; 29434839  |
| <i>Adamts4</i>    | 4.01E-08             | 1.82               | 24213506; 23319426  |
| <i>Fxyd2</i>      | 4.01E-08             | 2.07               | 26910837; 15280368  |
| <i>Trpv4</i>      | 4.30E-08             | 1.91               | 28759041; 29293584  |
| <i>Ptx3</i>       | 4.67E-07             | 1.93               | 27625097; 25679762  |
| <i>Sod3</i>       | 5.65E-07             | 2.32               | 24328532; 24922645  |
| <i>Tnfrsf12a</i>  | 9.10E-07             | 1.34               | 9405449; 21525013   |
| <i>Id3</i>        | 1.01E-06             | 2.06               | 27176047; 25693514  |
| <i>Nox4</i>       | 1.01E-06             | 1.82               | 28806703; 28422720  |
| <i>Anxa3</i>      | 1.34E-06             | 1.35               | 27878264            |
| <i>Il33</i>       | 3.69E-06             | -2.29              | 28978138; 28119694  |
| <i>Fam107b</i>    | 4.32E-06             | 1.46               | 22825356; 24748967  |
| <i>Mtus1</i>      | 5.41E-06             | -1.70              | 22153618            |
| <i>Pappa</i>      | 8.69E-06             | 2.15               | 23152806; 26020769  |
| <i>Pde9a</i>      | 1.73E-05             | -2.17              | 22469131; 23544068  |
| <i>Fgl1</i>       | 3.43E-05             | 15.12              | 22566646; 26225745; |
| <i>Bst2</i>       | 4.31E-05             | 1.76               | 28693265, 23840623  |
| <i>Loxl4</i>      | 5.12E-05             | 1.70               | 28060764; 25311867  |
| <i>Dpp4</i>       | 5.92E-05             | -1.54              | 27936466; 26816911  |
| <i>Rassf4</i>     | 7.03E-05             | 1.29               | 15574778            |
| <i>Rhobtb2</i>    | 7.59E-05             | 1.34               | 26131191; 21801820  |
| <i>Grk5</i>       | 7.59E-05             | 1.48               | 19008357; 29463786  |
| <i>Pam</i>        | 8.80E-05             | 1.35               | 29235204; 27035127  |
| <i>Nol3</i>       | 1.35E-04             | -1.48              | 21129150            |
| <i>Lactb</i>      | 1.60E-04             | 1.34               | 28642719            |
| <i>Selenbp1</i>   | 2.05E-04             | -2.43              | 24163737; 20332323  |
| <i>Naf1</i>       | 2.44E-04             | 1.55               | 26621032            |
| <i>Bmp4</i>       | 2.47E-04             | 1.84               | 20951698; 10578180  |
| <i>Csn3</i>       | 2.77E-04             | -1.64              | 22237956; 23613978  |
| <i>Crip2</i>      | 2.77E-04             | 1.27               | 22154084; 21540330  |
| <i>Tle2</i>       | 2.88E-04             | -1.31              | 27852056            |
| <i>Enc1</i>       | 2.92E-04             | 1.53               | 15459180; 11691783  |

## Supplementary Information 2: Cancer Hallmarks Enrichment Analysis

GSEA analysis for Cancer Hallmarks categories that are significantly altered in adeno-Cre transduced E-cad<sup>fl/fl</sup> organoids relative to E-cad<sup>+/+</sup> organoids. RNA-seq was performed by comparing transcriptomes of 4 adeno-Cre treated MMTV-PyMT; E-cad<sup>+/+</sup> organoids to 5 adeno-Cre treated MMTV-PyMT; E-cad<sup>fl/fl</sup> organoids. p-values were calculated using the t-test for the difference in mean z-scores for genes in the gene set vs those outside the gene set, with multiple testing correction applied using the Benjamini-Hochberg method. Genome wide significance = 1.7 E-6 (FWER = 0.05).

| Hallmarks Term                           | p-value   | Top contributing genes                                                                                                                                    |
|------------------------------------------|-----------|-----------------------------------------------------------------------------------------------------------------------------------------------------------|
| Oxidative phosphorylation                | 4.29 E-33 | <i>CPT1A, MDH1, ACAT1, NDUFA5, ATP5J2, ALDH6A1, ATP5O, ATP5I, IDH3G, NDUFA3, NDUFV2, ACAA2, UQCR11, GLUS1, SDHD, COX7B, COX7A2, NDUFC2, ATP5C1, COX7C</i> |
| TNF $\alpha$ signaling via NF $\kappa$ B | 5.90 E-26 | <i>PTGER4, NFKBIE, NFKB2, PTGS2, F2RL1, SPSB1, PDLIM5, KLF6, TNC, LITAF, TNFAIP8, BMP2, IL15RA, NR4A2, RNF19B, PMEPA1, CCL20, HBEGF, TGIF1, MAFF</i>      |
| UV response                              | 1.78 E-15 | <i>LTBP1, CACNA1A, PDLIM5, KALRN, DLC1, SCNBA, GCNT1, RBPM5, SMAD7, GRK5, NFKB1, HAS2, NOTCH2, SMAD3, CYR61, MAP2K5, ID1, NIPBL, PTPN21, KCNMA1</i>       |
| Inflammatory Response                    | 2.96 E-14 | <i>PTGER4, IL18RAP, BST2, TAPBP, PVR, IRF7, KLF6, RGS16, CALCRL, IL18R1, IL15RA, CCL20, HBEGF, RTP4, NFKB1, PLAUR, AXL, SGMS2, HAS2, PDPN</i>             |
| TGF $\beta$ signaling                    | 3.18 E-17 | <i>CDH1, BMP2, PMEPA1, SMAD7, TGIF1, ID3, WWTR1, SMAD3, ID1, LTBP2, SMURF2, ACVR1, JUNB, SKIL, HIPK2, PPP1R15A, ID2, TJP1, TGFB1, BCAR3</i>               |
| EMT                                      | 3.58 E-13 | <i>TIMP3, PVR, TNC, SPP1, NT5E, PMEPA1, PDLIM4, TNFRSF12A, PLAUR, AREG, NOTCH2, PPIB, TNFRSF11B, CYR61, PTX3, VEGFC, CXCL1, CADM1, SDC4, RHOB</i>         |
| Apoptosis                                | 7.43 E-08 | <i>LMNA, TIMP3, CLU, BMP2, CTH, EMP1, HSPB1, TNFRSF12A, SMAD7, ANXA1, APP, EREG, CYLD, CTG3, KRT18, MCL1, IGF2R, RHOB, PSEN1, BCL2L1</i>                  |
| P53 pathway                              | 5.47 E-10 | <i>RSG16, BMP2, VDR, RNF19B, HBEGF, APP, PLXNB2, NUPR1, DCXR, RPL36, SPHK1, FGF13, SOCS1, TP53, PHLDA3, LRMP, TOB1, TRAF4, ST14, RPS27L</i>               |

### Supplementary Information 3

**PDX model source:** Jackson Laboratories

**Model #:** TM00089

**Primary site:** Breast

**Patient diagnosis:** Invasive ductal carcinoma

**Tumor type:** Primary malignancy

**Stage Grade:** AJCC IIA / Grade:3

**Patient age:** 68

**Patient sex:** Female

**Race/ ethnicity:** Asian or Pacific Islander / Not Hispanic or Latino

**Treatment status:** Naïve

**Host strain:** NSG

**Sample type:** Surgical resection

**Mutation burden:** Passage 0: 4.04

**Gene expression and other information can be obtained at**

<http://tumor.informatics.jax.org/mtbwi/pdxDetails.do?modelID=TM00089>.
