# Supplementary material
Source: PubMed Central journal article supplement (PMC7365572)
Supplement: NIHMS1536825-supplement-3.pdf [file NIHMS1536825-supplement-3.pdf]

**Figure 1b**

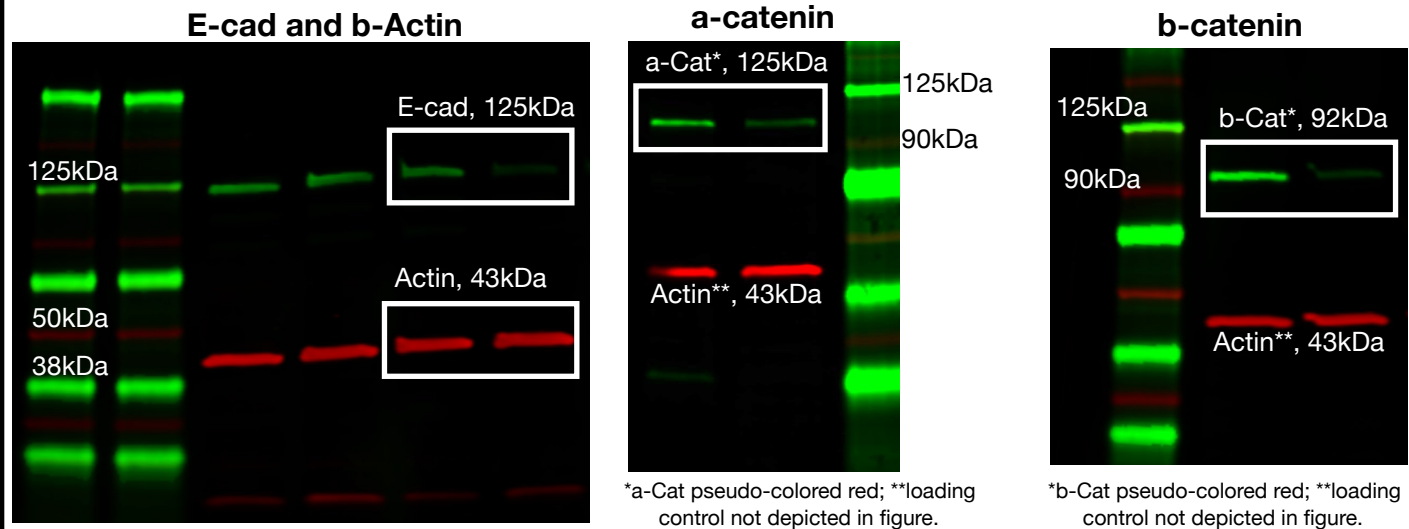

**Extended Data Figure 5d; E-cad and b-Actin**

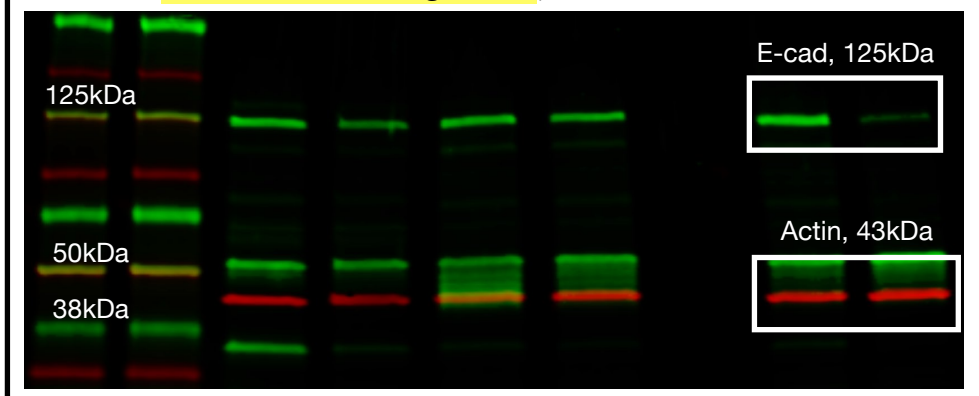

**Extended Data Figure 6b; E-cad and b-Actin**

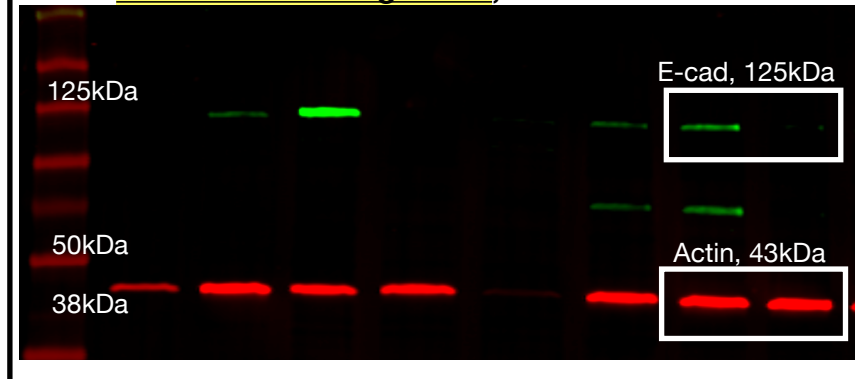

**Extended Data Figure 7e**

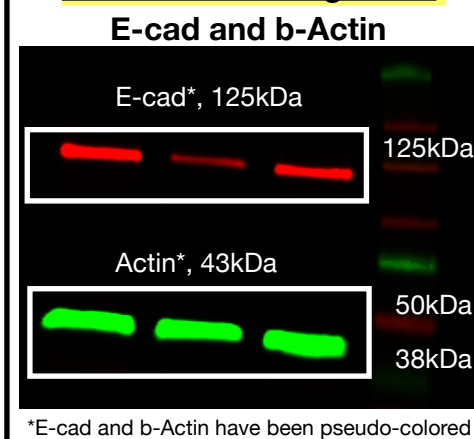

**Extended Data Figure 8a; NR2F1 and b-Actin**

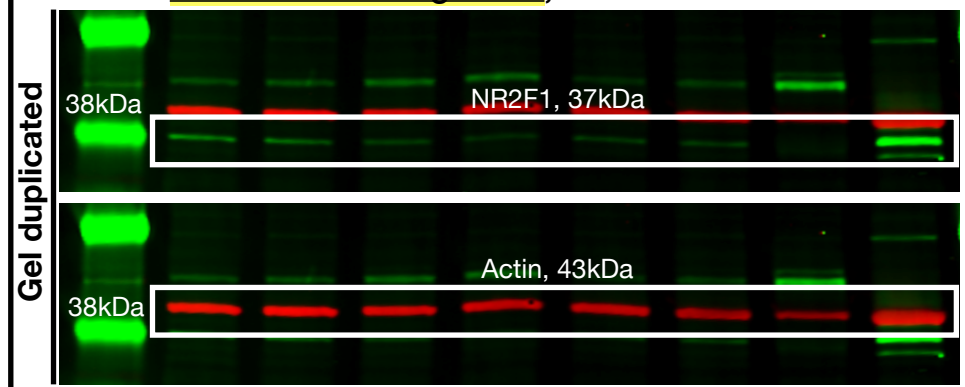

No membranes were cut.
